# Supplementary material for: Inferring protein from transcript abundances using convolutional neural networks
Source: Springer Nature journal article supplement (doi:10.1186/s13040-025-00434-z), 2025-02-27

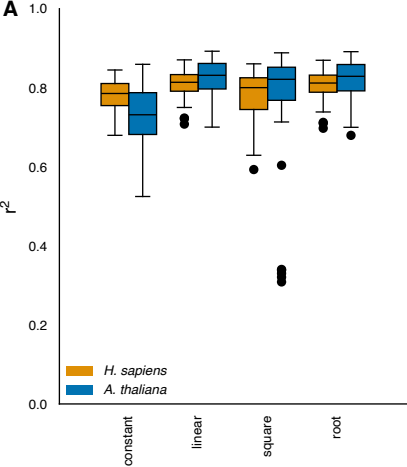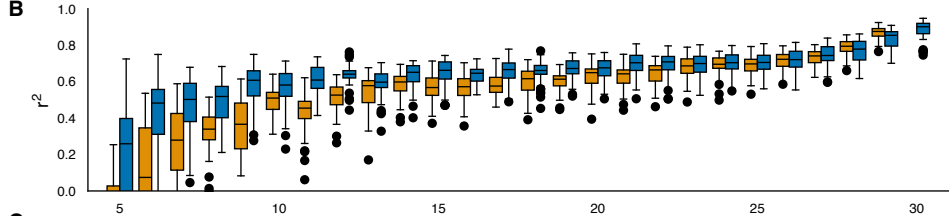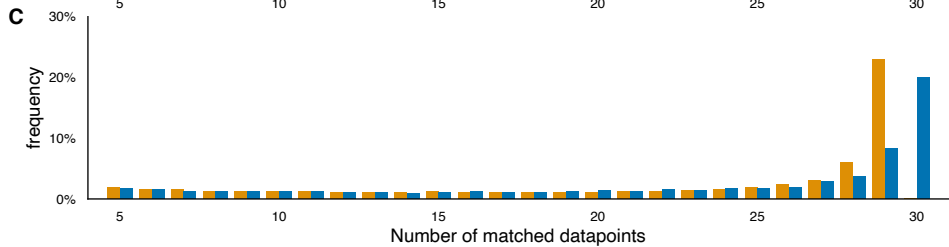

Supplement: MOESM1 [file 13040_2025_434_MOESM1_ESM.pdf › 13040_2025_434_MOESM1_ESM.pdf]
